# Supplementary material for: Persistent Chaos of Measles Epidemics in the Prevaccination United States Caused by a Small Change in Seasonal Transmission Patterns
Source: PLoS Comput Biol. 2016 Feb 4;12(2):e1004655. doi: 10.1371/journal.pcbi.1004655 (PMC4741526; doi:10.1371/journal.pcbi.1004655)
Supplement: S1 Table — (CSV) [file pcbi.1004655.s002.csv]

country	city	biweek1	biweek2	biweek3	biweek4	biweek5	biweek6	biweek7	biweek8	biweek9	biweek10	biweek11	biweek12	biweek13	biweek14	biweek15	biweek16	biweek17	biweek18	biweek19	biweek20	biweek21	biweek22	biweek23	biweek24	biweek25	biweek26
US	BALTIMORE	40.96902922	36.26137846	39.59123288	41.61026987	36.30879452	38.91905598	37.14479667	41.08364094	38.16067551	32.91104101	25.78058588	23.47612124	19.25164853	18.12824215	20.01339824	17.11766025	31.99753998	32.45390276	22.35486576	45.00968778	44.46297688	45.71202041	38.04348277	35.44718351	28.88556291	56.32289657
US	BOSTON	37.94589076	40.48362521	33.55229697	35.3222193	40.30065343	39.65497067	35.90717069	37.39709955	34.62328094	36.45927685	31.24399904	26.17420775	24.13087137	18.13671558	16.98335916	19.87211698	22.51049643	25.66872096	42.52782533	39.96383433	42.46376669	38.28654088	42.93569104	39.70481253	35.71932727	41.62193667
US	BRIDGEPORT	32.84357277	27.49181835	37.41687054	29.29126342	39.10855235	41.42013246	43.29679954	42.98579428	35.81484978	35.91302169	33.30539782	23.6629392	26.23363448	18.25188083	25.99520439	16.38363876	19.94570541	25.14075907	44.5015477	38.38205341	34.25911364	27.92322661	57.87698818	39.68281741	38.17529298	51.98391574
US	BUFFALO	33.01516994	35.5126944	34.57852928	46.87999228	35.09598451	39.49251715	37.67422927	36.76098285	33.782736	33.85608681	30.03080242	25.5096646	19.9046331	14.15871127	18.98954636	20.11892027	19.63837033	29.01874953	38.65731479	43.45041939	45.24954902	46.46788247	34.3592891	43.59158232	34.18794574	43.44249129
US	CHICAGO	38.1274795	41.02649345	39.19056927	42.88646853	42.75070678	39.40627087	39.77742687	38.91152925	37.3087849	33.15957662	33.156588	29.57136268	23.0113016	18.48150379	16.11871741	22.06466558	21.81271772	34.89716241	30.06870063	40.55212949	48.4415466	40.18793265	37.55569773	40.85867605	31.2700805	49.77809937
US	CINCINNATI	33.49689003	37.55814307	42.00873443	44.78536292	36.90839163	41.32224023	42.84220075	35.41435599	39.21700678	26.77614147	34.26881639	23.32339761	23.0307663	16.42397578	18.80255658	17.98644948	33.19354874	20.78042797	26.94213171	48.03857807	42.92711432	20.6859143	52.86500598	43.68502431	33.1028668	35.24490056
US	CLEVELAND	33.9230777	36.51777721	47.97641637	37.43518078	43.39602317	36.69129287	40.8264497	39.19574285	43.68516333	34.99287183	38.85733221	24.18028265	23.64930024	18.07205184	18.43380696	20.4957703	17.5551546	28.97543485	29.23505497	36.34857661	44.93781612	38.48580635	41.02000517	45.47106713	29.12784912	42.52099797
US	COLUMBUS	33.76511986	46.0548272	44.90062156	34.00496115	46.17158755	32.39544179	40.01379007	36.40414952	37.05600775	35.79191313	26.45527394	27.33624564	17.99391671	14.56461298	14.42917181	21.67930832	24.47762538	58.87850895	18.60531427	21.4968161	37.12710036	43.64330501	35.77613917	42.89871297	29.19135381	50.98690546
US	DENVER	31.99055096	42.04705339	44.40552683	44.55923878	41.1676202	38.1656563	38.65180057	40.27656301	38.54709361	33.84510089	27.13451373	30.12748311	16.57904427	22.47232293	17.13806807	18.43318209	28.66252062	33.59739489	36.14622603	35.30069355	24.10958377	46.11757027	39.22234831	39.54836916	29.58932199	49.87001244
US	DETROIT	35.2959129	38.75792282	45.80458965	42.84948904	43.67988097	41.04322055	38.14575725	36.95695654	36.9697453	39.65543146	35.3417633	23.07643597	19.8601545	15.68290907	21.47018607	20.94743936	19.5312849	37.00166995	35.05795914	48.5413024	39.97538179	44.38323599	35.87875445	45.2702763	22.27720782	52.01473647
US	DULUTH	30.45061314	44.10280227	37.16117476	35.89758992	43.62953844	31.75147254	59.22254322	56.6413346	52.18710525	42.45925289	54.34030893	35.16018243	29.06661398	16.34438588	27.33918108	17.97432773	11.83967345	33.8545216	25.89223148	31.75406423	31.92678293	40.00599357	31.85989581	53.04888996	30.77470059	40.39751108
US	FALL RIVER	32.60054197	42.13023234	30.15505357	35.8100266	35.74983442	38.18871582	32.27470133	31.06932544	52.12416792	28.03427982	38.16694297	25.22386153	26.19198237	25.81869996	16.64910604	19.0803003	20.44121466	33.90056539	46.0964142	30.25143678	35.69132479	30.0778763	35.06531607	35.08593824	31.01278779	51.4721835
US	GRAND RAPIDS	32.566875	36.38390203	39.35958497	34.76611859	47.53965615	32.93479908	43.05953927	46.15914306	31.88217397	40.06871953	27.84447214	29.95636111	21.34328546	24.095004	16.58824358	20.94958065	32.18017826	49.32923805	30.88748855	28.01042872	41.58249254	36.02170621	36.21516634	45.5952079	27.67422554	60.64672997
US	HARTFORD	37.80374174	37.94403379	34.51304675	52.20619929	30.49877371	38.88911649	39.76261783	36.60271494	29.70208968	30.81145686	37.57211244	20.85889763	24.16313331	22.53578602	17.09363463	22.08262606	34.93354262	20.20730152	19.74195683	61.4446743	29.03921327	46.44599528	29.50075458	37.62607563	35.45038539	58.9642008
US	INDIANAPOLIS	46.92306915	37.28790485	39.35072547	49.21498322	44.26655739	45.02600104	38.32296903	40.26457086	37.59047128	31.65045778	28.23917558	20.96584246	16.04320085	14.34039721	20.59546322	15.6722203	22.86503472	34.33626308	49.6564326	59.01251499	31.58804484	26.82245915	29.35529777	40.22936117	34.07194165	46.69830177
US	KANSAS CITY	45.73341475	46.89806283	37.9431461	41.43753669	36.47405237	34.05308415	41.3339677	30.76387077	36.53457856	26.2620549	20.71363199	22.66475216	12.89199042	21.64822999	21.05991045	40.50711381	18.45012463	31.87443546	30.67113691	31.24772756	33.79786399	32.55620326	29.53401423	52.25810849	28.16056011	60.8054263
US	LOS ANGELES	50.47478398	47.7968544	44.62118616	45.25834412	38.81250116	33.13420889	37.04963987	34.52419707	35.37514324	33.12325162	30.6074807	24.90516186	24.34641241	25.81319573	17.78466147	19.12866687	34.26975741	26.88361156	31.22074165	34.4803805	38.39543148	27.68350834	40.62652038	37.85711919	28.76872504	50.00973705
US	MILWAUKEE	39.50453059	34.89368826	40.89005225	43.68433717	32.6417076	36.05647107	35.5861893	36.57603746	46.9456038	39.64503542	38.3304594	28.63234668	28.43290943	18.64314573	18.75479271	17.99480184	22.50607858	31.19791285	31.49208172	38.10008477	41.42167336	34.54176781	40.0734668	38.64008504	34.92710593	32.880012
US	MINNEAPOLIS	45.7969548	42.56665833	38.68091301	46.25658127	43.04085166	37.8149745	42.48814028	38.87295697	38.13948286	30.58080994	25.92489337	14.15885172	22.65690513	17.22037709	16.80569352	29.48527662	28.64077388	32.63547081	45.9901967	41.3828773	31.60364685	40.70591508	36.08868334	42.11356462	30.71234522	55.54033555
US	NASHVILLE	43.17998635	47.23372655	41.60663407	61.36919107	40.24456821	31.29187262	49.84683806	53.56370219	40.70881048	40.41098712	36.42629151	25.66123924	23.32545802	11.08337808	23.56029179	23.04490619	24.86755313	22.58397874	30.10897412	10.91258622	31.16886208	39.87653818	30.26114985	42.88940162	35.08100106	39.67211074
US	NEW HAVEN	31.22680379	35.36723361	27.79336889	42.72522856	39.6683071	37.22313226	33.89521064	40.81221032	37.55121533	33.64733346	35.24751154	20.93150267	19.5658506	20.64140819	22.64360751	29.36236227	24.45139931	19.58685591	50.86580144	40.64601038	31.37407696	53.30083277	31.50382852	39.72866006	37.7027684	49.90969981
US	NEW ORLEANS	49.0562893	32.31267276	35.92754657	37.6954558	55.05211849	33.61553975	34.80324549	51.09618865	33.66643643	42.54242284	21.44215951	35.053272	35.51022682	16.40031834	28.78801659	31.65831578	36.91136579	27.12721251	36.68515858	33.32485215	24.10494733	39.48967303	39.18560541	40.71873767	31.06915739	66.8882048
US	NEW YORK	37.02967208	41.1527942	50.40478925	42.06968456	43.30473348	42.72735233	37.1101419	40.72938875	43.42724907	34.88418632	32.71068701	23.85066064	21.22318875	20.10816611	19.34551694	19.7285101	23.34735585	26.54147232	32.87976762	43.26946765	43.81849118	40.90610672	44.71747206	40.30245545	32.0828781	48.55464993
US	NEWARK	40.49568889	41.29424809	41.08968538	39.65259291	38.89184606	36.28195207	34.71885975	36.21578391	36.93778528	30.38526202	27.21194732	23.76024088	24.84723088	19.38957989	18.38915627	16.44740575	21.89732633	23.41164945	32.66797941	33.12866182	45.0384633	46.91378515	40.72257329	35.56673157	33.23220415	41.69519524
US	PHILADELPHIA	42.18640432	40.74454829	45.81844905	43.18260032	39.98609939	38.6750622	42.52361277	37.55950715	40.49858887	34.46514464	30.70281205	25.35973415	18.09194732	21.47553391	18.82865875	15.63242279	23.64136022	35.99416683	26.47883149	44.05837571	47.07575646	40.0960817	44.19723156	38.9880131	33.75838535	45.11300604
US	PITTSBURGH	35.31861753	41.97305629	38.31131928	40.45494939	37.61449532	32.56811967	40.95804137	39.72488668	31.71848278	31.19869313	31.32342929	29.26729727	18.77357299	21.2359798	11.6247773	21.34935164	27.25251704	29.81322448	42.4119428	45.54865433	33.08253313	53.66804186	31.57487717	33.13860588	34.54267693	46.58523516
US	PROVIDENCE	36.4576883	48.86878778	36.91890905	37.53075447	28.91709766	48.8068085	35.35724955	41.86463577	35.22450143	31.41063019	33.05239974	27.17883268	32.05934184	26.11616547	15.90994869	16.24177215	19.56856234	23.75750604	43.88244007	28.31616604	41.09513414	32.12507955	63.301607	30.82595218	42.43353759	35.80202439
US	READING.US	40.25263047	31.22007722	39.92717937	43.06481529	36.10294814	31.60405601	47.06048359	37.685608	44.0221537	33.21334019	24.8141638	19.80123832	23.12440347	17.69076906	21.38547827	19.08302292	29.31094019	35.49848495	36.36001684	31.28866839	36.69672859	46.95865593	36.91787992	24.8233295	22.76786496	64.05305086
US	RICHMOND	53.58656098	38.25100894	42.04490073	31.24029934	51.94422322	50.88715523	36.27628707	38.77261107	37.4488352	35.79052413	32.54689482	29.9511073	15.54331749	18.5489617	13.98151291	19.1868638	17.88477413	30.77628192	24.8016911	38.50842112	24.14585412	66.72465132	32.3336471	53.96292856	34.17388023	45.83791895
US	ROCHESTER	33.39466716	30.61063343	30.31796522	40.43407714	45.24140691	35.81971014	38.70589981	38.10703296	42.77696158	39.15740478	28.84588596	25.98852141	19.71373653	15.82814785	22.80635753	16.8638534	27.97575602	35.14691937	41.00642833	38.84156688	39.40329832	44.20381113	33.0061787	36.92128466	36.83988893	36.14974662
US	SALT LAKE CITY	50.78237813	38.05750325	43.18648294	58.97489952	49.48591895	45.0297137	43.91358552	36.74226125	42.68712558	30.58733719	64.23843603	36.51189292	34.59827991	27.46654354	25.73242655	23.39516161	37.01959455	31.48690632	49.98309241	35.48929354	37.93538409	47.525453	35.21805632	37.77099663	33.48645833	54.94684678
US	SAN FRANCISCO	43.5414326	41.31150455	30.49905295	40.21306942	42.50272223	28.90128737	40.78836	31.59481566	41.09013629	33.37565322	29.85641307	24.35551242	19.60454743	18.30609093	26.00052592	30.70139235	36.27839127	29.50790013	33.90742275	31.64848705	27.73424597	43.51920668	26.50028939	48.487349	21.4166749	48.10992503
US	SEATTLE	36.09564095	31.89633609	41.15727039	39.84019355	33.5677543	44.60188478	33.04923896	31.75756069	45.39268941	36.71620326	35.17650301	30.34060534	19.64197466	23.71916933	17.66439635	22.12220287	14.2742328	31.82726767	28.66071334	34.66058937	40.52435354	39.37945302	41.67872818	37.60436336	25.14636471	80.55231845
US	SPOKANE	50.67449755	37.30479833	24.55609427	25.94112243	40.54459402	53.63583431	33.34165192	46.93391946	29.76550457	59.27849737	34.62828487	28.88181058	26.65339498	16.39495997	19.24227553	23.97337142	21.60877379	37.75194937	29.91261986	28.29939828	54.04040071	42.96597656	51.73344035	41.11391677	31.79755553	62.26978377
US	SPRINGFIELD	31.80084653	34.02061624	35.28975341	34.30525271	43.24858227	31.07283901	32.7324881	34.17970919	29.49803438	27.63566007	37.72653077	28.26833164	24.11664843	16.8402914	24.87166549	19.04774236	33.7717507	23.59007316	31.28828109	39.10998923	28.94799845	35.69687444	45.29354376	43.00569345	36.37337485	47.22371531
US	ST LOUIS	37.42028648	36.16743498	35.62979333	40.31549671	41.99957067	37.77717862	38.05728351	40.41617966	39.48337328	30.91295053	27.8113686	29.6282401	18.13278548	19.18415822	20.76183656	22.30428094	37.38619546	30.17031567	34.53653938	37.12513691	38.41308677	42.940424	39.08942679	35.86936331	29.43071982	54.0235942
US	TOLEDO	30.21610928	42.53398723	41.30400632	33.37253991	47.81693033	40.47889203	34.65502394	33.80549326	43.98587774	30.82161003	30.15724855	26.06955633	18.55944974	13.281145	13.47563296	24.67438912	26.47508046	25.6777631	34.16824267	42.63583209	43.1860258	43.6238099	43.39459386	38.95538721	35.05828307	45.56293248
US	TRENTON	40.51174798	38.95269186	31.84035634	31.03186435	38.06360698	33.69229747	36.70185952	31.16216828	33.27495781	29.90221036	32.38352492	34.23702732	25.73472973	17.59261885	16.61735405	14.53996643	23.03344254	47.49277464	38.94903741	32.29434889	46.14469106	45.99921631	41.81748399	64.23945924	40.9573916	41.34741724
US	WASHINGTON	48.45024387	38.22767173	41.40742584	41.10267066	48.31838216	37.98749124	41.47374812	36.72666843	38.77238497	31.03636226	27.43393707	25.43559465	20.95529407	16.29482787	14.28467799	20.08858499	23.03578561	28.07980716	32.40629019	36.15957318	33.39885627	37.85079673	38.3314785	25.30818052	38.6273089	54.11717328
US	WORCESTER	43.67504838	28.19413675	47.9004087	30.32156803	36.26091328	26.87092076	46.26928884	46.45189972	40.71516489	42.58059853	31.53349562	20.71824657	25.56815356	22.43141808	12.3880786	18.2342553	34.68727811	23.47933634	43.87297853	34.5220022	33.77002299	31.90252629	23.37590677	46.35566047	36.75072056	43.74246687
UK	BIRKENHEAD	36.4231987	46.53662904	37.27048982	34.76187137	31.55685411	42.67520108	30.33057312	28.71258684	30.55937149	36.98431024	38.09727287	32.91003332	27.50188466	30.46979857	29.6273259	25.98317575	17.19886616	19.69413833	25.53328103	32.0940577	38.3459447	30.62172683	35.08097057	30.21268603	39.13689991	57.14732172
UK	BIRMINGHAM	31.34926264	45.44632558	36.48794371	42.56375891	36.42506713	40.11865845	32.01598343	32.83162675	34.24528848	37.75894301	35.78078449	32.0932082	30.30661984	29.22534275	26.73571252	28.78670693	21.32132545	23.251981	29.24097105	36.29955566	36.65502219	33.85601951	42.61881427	32.56701174	36.91989087	46.17073718
UK	BLACKPOOL	37.92307618	38.61568797	33.70815688	40.06347382	26.25787361	33.00379273	25.57408243	28.55545782	29.60647271	44.45360838	30.8710811	32.51408585	32.85524421	32.87251962	35.93486247	16.63552036	23.07119755	19.57019442	33.39181134	43.86482895	36.07718917	38.17593279	26.81100794	39.51087206	30.23385404	47.44279503
UK	BOLTON	33.18408687	34.35502029	37.87904982	30.19952988	27.60011241	26.44010011	39.4052338	27.94337541	34.28267002	33.72146428	29.77038036	30.88164694	28.89040243	32.70968355	42.58987115	33.10540263	24.71759173	18.38238012	29.63636393	47.18500104	36.58468455	38.25495453	24.80685407	34.31729578	35.70810581	41.75901097
UK	BOURNEMOUTH	44.30686086	44.87421924	44.06811754	30.97720235	37.63376487	50.3365016	27.18341177	24.36634918	27.77342046	38.68524072	40.08794149	31.07188342	29.90042665	29.523629	31.75327388	26.54069508	21.29911356	14.64800421	19.37204416	19.58881908	41.69420257	60.46862957	27.28474274	34.12659844	37.38237264	36.24044094
UK	BRADFORD	34.29143424	36.23188667	39.19360972	40.4751568	36.34839236	36.7749536	33.88581655	34.04750429	32.76065838	36.47239491	34.31697465	27.96837367	33.07006955	30.86553002	24.80631796	19.94056082	31.43719471	23.91394077	29.55301623	27.94724885	35.0582406	35.49807106	28.03183818	42.30349827	32.81367629	37.75033253
UK	BRIGHTON	25.52181699	37.62245737	46.84714651	27.52924427	28.66479847	53.29700785	32.81375083	30.73151922	44.12948294	34.94198346	45.63457177	28.50201814	28.08999285	27.54503323	24.30398113	30.38977508	19.59418443	11.40406825	35.26602351	23.59023607	34.18722369	39.73825229	34.4476988	41.57683596	37.86329375	50.29393109
UK	BRISTOL	30.60444732	43.02873032	42.97779579	36.0530166	35.52693889	34.3755483	33.75143667	32.29106414	39.43581279	36.91501473	36.58037317	36.09662038	29.48296365	29.43610925	30.89534638	22.09273673	24.31253352	15.62425381	41.02808151	31.16900852	26.32882851	35.01579731	28.10568422	46.0332838	37.58306704	35.84138518
UK	CARDIFF	30.84960719	43.03495567	37.08957206	33.34063019	49.8636579	38.57980985	28.30049403	34.39729665	29.73305976	41.48715167	37.46949928	25.92716739	38.92165475	31.41494114	25.15211048	25.17012461	23.53678026	24.30655159	30.25391397	29.78699855	30.18851227	38.66783151	27.98178178	50.85658173	35.23253655	51.76082747
UK	COVENTRY	39.1938007	45.85316705	48.09099641	30.60679745	41.05018155	30.1304952	34.77069671	28.52380093	36.3392063	29.56330796	36.88483551	26.1988595	28.04035391	23.5900578	21.95658315	40.00370408	21.90823824	22.78076495	29.94489357	39.70131724	31.65988055	36.41003172	27.96558273	27.40445532	33.04802162	64.02900023
UK	DERBY	37.7813587	44.24663423	37.03539787	30.0155873	34.65389276	34.44760603	30.95148643	24.51764184	35.13222374	30.14663003	48.96469089	35.49639623	38.8981353	20.308752	25.49989231	22.44367631	31.52740942	19.35313112	24.35258935	32.00753931	40.13520245	34.48875517	30.88073123	34.86137171	28.38430697	53.56358924
UK	GATESHEAD	25.92340725	38.11615281	38.11115178	26.95872878	42.84123813	35.97140805	39.57622625	32.16076009	35.50659119	34.39520842	37.24762918	41.38449496	22.54308941	23.4928546	23.23672884	30.6663974	20.71344598	27.95246428	30.60230214	32.98434017	44.64765493	37.89974414	34.10295405	27.6173116	34.74658352	46.09809322
UK	HUDDERSFIELD	31.3906409	36.99050356	33.55916348	33.79218526	26.54076386	39.49933195	30.47162156	33.80201995	35.61926541	54.83925375	28.49040013	40.31056181	34.14878302	23.37621275	33.63445244	23.3194387	23.80194821	22.80918363	40.46208193	57.45387127	27.60645015	45.37936884	27.39113607	34.0531046	33.53459193	43.09438721
UK	HULL	31.77035707	27.66515624	49.2057545	44.71184939	31.19871492	39.22979523	32.36073355	32.29961738	36.24998204	36.1275151	42.13760964	30.47806803	41.01570052	31.86023651	28.13468544	29.65484283	23.2118976	23.878112	27.65444942	34.72336935	50.2458408	38.25484403	39.25107545	31.00166565	24.46282387	44.53169864
UK	IPSWICH	29.38186944	42.79463836	39.98421279	29.63892014	30.92369046	42.80445864	31.02946001	31.9895438	28.01168011	34.93302868	44.0642586	38.40460438	27.45830381	27.21217769	23.72783324	26.03438071	26.13744683	15.13348279	20.55428646	33.07752668	33.63797274	35.36116592	36.5007988	44.41667242	39.65289415	48.21782944
UK	LEEDS	28.99915238	48.96508147	31.643782	42.79922814	42.68386638	34.67220702	33.0926338	33.8919105	33.22886573	35.98620492	36.09015739	29.22351049	29.74466119	26.96932863	27.57130876	23.03992184	27.07147142	23.52045565	32.91655247	35.68711365	48.00778928	29.23017155	30.37764638	33.133057	34.60496178	42.76588592
UK	LEICESTER	24.80622096	40.16059072	40.47312043	47.39293552	33.60637853	50.81551259	33.92839598	25.80654743	34.34410543	33.08893664	34.96497561	31.68327373	37.48890827	26.11789235	30.60803382	22.54881698	21.03854092	13.42291142	21.50200767	43.76375478	33.91465328	51.42097426	35.21726896	44.00868091	25.44381108	55.41976879
UK	LIVERPOOL	31.78838677	39.5089989	44.01951443	35.46587422	34.72357703	39.54409135	34.03070062	33.48698626	32.7666861	38.94603063	36.65223861	36.44817111	33.45826317	29.51514689	25.25915858	25.27548221	27.21544131	22.67406732	38.19022224	35.06491586	36.12977618	32.87754179	38.3671222	35.74489839	30.49501566	41.48304097
UK	LONDON	34.54592011	51.47932204	43.26848443	40.68710521	38.55092735	39.56303376	37.45832387	29.99123058	37.27176406	38.0727012	38.40922966	33.38977029	30.7644768	29.89457837	28.04534182	25.32124808	23.66715707	21.67679988	32.88915569	44.05782323	38.75897178	33.65944739	34.60708494	36.97664574	30.43958378	46.52846852
UK	MANCHESTER	31.65018359	43.33846889	39.28722675	35.88773208	32.79324551	34.90480027	31.68143358	30.84731885	32.19887333	35.51336612	38.63597549	36.79335122	33.75830978	29.09952015	30.24559283	25.30744611	23.94283618	25.26886114	38.55823324	34.74048326	36.83843915	31.72014897	35.01473343	37.63408248	28.87378554	45.21758471
UK	MIDDLESBOROUGH	28.78534998	39.26774152	32.80274546	31.04190038	34.90434963	31.09470465	29.25755419	30.38412447	39.11933507	38.39746448	31.91567236	38.70627678	30.49352832	27.50059181	24.75565461	27.50319038	27.72890503	24.57518327	32.14037167	40.72916196	35.87831252	28.39378499	38.9745693	28.32704641	32.28215808	56.01065625
UK	NEWCASTLE	27.73153069	39.31261375	38.52212656	34.20666126	34.66543889	30.66574958	34.57905671	35.92543256	35.91056336	34.14434116	35.65793199	39.23763861	31.96704122	22.07905004	26.55131647	28.05460952	28.79780193	24.04838156	23.11784115	36.44948577	29.76368059	27.5722604	36.07614524	40.10748385	32.58665306	57.06220257
UK	NORWICH	24.26532614	46.20776319	68.82115715	29.17884478	32.87653697	37.03280139	27.88090313	25.30571505	33.24476242	32.54734811	29.87612898	30.64891866	32.66262667	28.10706975	31.36654743	29.04189387	23.90978963	17.59399096	19.51930166	54.37446384	35.43275394	22.18245231	37.63930165	32.21690557	37.6888573	63.76604773
UK	NOTTINGHAM	35.6648997	33.63206823	37.04729117	39.93647373	32.2647005	38.7465651	31.79390755	32.52459044	29.39114661	42.59723774	36.38247749	30.59090088	31.85927823	25.85934302	34.83409655	25.58126802	19.62074911	18.22637356	32.39644032	31.50356276	49.37244502	37.97658439	33.3821133	42.78094248	21.45601469	51.20269747
UK	OLDHAM	32.89649314	38.91671331	32.15353156	28.53097197	29.4067794	29.65479209	31.11277553	28.29711392	31.88656492	31.74503797	31.10400789	29.42768262	33.7087787	30.12718007	29.52500626	26.09557642	26.82858002	18.3675723	41.60956399	36.93563146	39.18736846	39.01042471	26.34862556	51.77571564	31.00456092	46.37051594
UK	PLYMOUTH	33.37506173	46.27764222	40.68926694	38.0204472	41.98452511	29.89624941	29.01484605	28.04420943	30.607333	45.99095465	26.89469557	33.26114482	29.66730991	29.81106778	35.3993731	27.38606037	23.43907413	18.81382674	20.05885326	43.36499412	35.23658016	43.89224594	29.9311858	35.27186836	35.19567897	40.84922311
UK	PORTSMOUTH	40.72775826	43.39363414	49.28880928	30.50108059	39.87122204	36.91526147	30.24764031	34.87325543	29.57647805	36.43540526	36.53625379	33.73686324	31.04615729	22.56020523	25.52351976	27.97461286	20.74567267	22.31862058	21.4238056	28.63297519	32.56495939	47.28129168	26.92525472	40.22018726	44.78757088	42.70015871
UK	PRESTON	36.95281726	28.08045924	39.34823844	29.67198124	33.13839245	31.29270988	31.43829216	28.28377622	26.8523111	38.82980589	35.9135105	36.7887025	34.1021078	27.79561897	32.60056454	25.04999311	30.48002233	28.81811819	37.75629135	50.84018057	37.90372867	27.99879673	36.51279592	33.16773125	33.43368669	44.7576747
UK	READING	43.73029119	41.74226446	57.39771219	30.50784279	36.00335858	34.35919883	33.32704521	33.67020643	34.23452409	32.9967028	35.47764731	37.75076028	35.86986207	24.64218776	23.59178571	29.49027729	15.88196151	21.40958156	23.94082219	29.49366531	36.52547233	40.85493744	44.37020631	24.8124763	24.73657519	47.92253387
UK	SALFORD	34.70262609	33.44213108	38.08522724	31.56652066	37.72907021	38.12141233	29.29857139	33.20870528	34.76614675	36.1621495	37.06496188	28.35787539	30.10787652	28.31045621	24.01793577	25.90321614	22.7584713	20.83025997	39.79428929	33.35298025	56.60395456	29.52005764	37.80050266	34.28915778	34.52130129	42.31281093
UK	SHEFFIELD	24.30358381	41.278005	43.28232189	26.75643811	39.79091454	33.06566269	34.35914787	30.14340539	31.53325418	42.53815239	36.30251209	39.2214027	33.47632835	31.7168912	26.53519066	26.23437372	23.0384041	19.53336452	29.43671298	36.13375543	41.66323931	28.23928779	40.61067062	33.98876412	36.4386576	42.36683586
UK	SOUTHAMPTON	31.58573064	48.04392898	45.28849715	34.76316703	41.55511006	28.43176321	34.18002722	25.10291633	34.69942709	37.79473581	32.5143333	39.589149	32.96584716	26.55034696	30.11481152	26.4437392	23.00234874	19.55341064	24.68517188	21.26149074	40.4951636	38.35579412	31.19833945	38.93272834	37.34106935	64.53870667
UK	SOUTHEND	39.33294823	45.72613838	45.64719785	38.16140976	38.37098707	44.36754845	24.90919087	30.66763056	22.53976558	34.19032846	40.5576794	35.58307181	29.23613068	30.24677844	28.42798351	32.34061528	11.67969584	19.89620195	22.75617034	20.82275632	65.27566381	27.81396076	31.35611804	30.68432348	39.45252708	49.58055358
UK	ST.HELENS	28.13191694	57.77212102	39.70132582	30.71988764	32.18578189	29.67020147	36.87407566	28.08039658	38.61343389	31.72466979	26.41854315	30.32789502	35.71853644	26.90817637	29.15793675	23.90841296	28.47675086	14.525228	38.92553742	31.9555192	31.00049486	30.39463586	36.52957913	30.10819527	33.84473421	56.15822254
UK	STOCKPORT	34.6569726	59.18000322	44.24026328	29.23748357	34.78115776	33.62499636	27.75353461	31.57185153	26.34566276	36.29491189	29.74925096	38.73708235	21.02868806	39.92823256	27.93205859	31.12549049	17.3034122	21.6728077	36.34129359	30.21970762	46.76944841	40.26764418	21.78016032	28.55363869	38.82035334	40.81041659
UK	STOKE	28.64878752	31.64664199	34.48231956	39.11256677	42.03742333	36.33849935	34.66175958	29.78579416	36.94455	33.15219973	32.99450001	33.60475007	31.76326157	33.2640932	26.12986631	26.86251376	20.5178349	19.85095776	31.89792302	44.71974015	37.86828633	43.47616815	32.11239364	29.08524254	23.49536356	52.38124461
UK	SUNDERLAND	27.81243567	37.10914951	34.44729506	45.43621061	37.66601241	36.77951487	39.96810913	37.23958805	30.22705187	38.84804653	31.42025099	39.45106464	32.9969067	27.09205211	25.64790938	26.93620867	26.19208993	20.89357265	30.09748502	33.65386476	29.06959878	28.46078203	35.32441242	38.68625961	39.13590893	41.16942424
UK	SWANSEA	31.7861647	50.36753759	43.05303769	38.80215951	31.87378136	39.90938867	21.34975517	40.15522979	34.88500825	36.51212974	31.9959895	32.05756994	35.43992763	31.5945716	24.73264401	25.61170891	22.86182303	20.08443848	29.3085931	37.72103416	32.22351095	50.60004229	24.40818293	34.01261419	38.69109188	39.32814785
UK	WALSALL	30.87645803	53.43092777	26.5681218	38.02792172	41.08173944	26.68805525	33.42180245	25.5352178	35.17767185	32.60734904	32.62711819	32.68896114	31.96347523	26.72681144	29.29778195	23.49298345	26.47965744	19.12497222	30.21357557	35.62570491	36.26512506	28.44477989	35.13884842	23.27329843	46.11490255	46.34501012
UK	WOLVERHAMPTON	34.14749017	43.08493499	41.88349635	35.68906322	36.60672364	40.81831671	27.99257029	29.18155283	37.37354583	30.42559425	36.82091823	29.87464203	29.58540114	23.61907959	26.32517373	29.50082159	20.6189137	18.48645662	38.14569866	32.11552011	25.01363525	27.80068944	50.87939635	30.74854668	30.98953111	57.05502992
